# Supplementary material
Source: publisher site journal article supplement (https://www.dovepress.com/article/426043)
Supplement: Supplementary file 1 [file get_supplementary_file.php]

**Supplementary materials manuscript 426043**

**Supplementary File 1**

Observation Fieldnote guide:

**Field Observation Guide**

| Date and time | Location | Unique ID number | gender |
| --- | --- | --- | --- |
| Who is in room? |  | | |
| Child’s diagnosed condition/situation in education session |  | | |
| **Dialogue** |  | | |
| Nurse’s use of body language |  | | |
| Open ended questioning? |  | | |
| Steps nurse took to establish parent’s learning needs? |  | | |
| How did nurse create environment conducive to person-centred care? |  | | |
| How did nurse explain management strategies to parent? |  | | |
| Did nurse demonstrate treatments (if applicable)  If yes % of consultation time |  | | |
| Did nurse allow parent to practice what was demonstrated (if applicable) |  | | |
| Parent reaction/response |  | | |
| How did nurse link parent new knowledge (what nurse explained) to parents previous knowledge? |  | | |
| Did nurse encourage parent to ask questions? |  | | |
| What questions did parent ask? |  | | |
| If nurse did not know answer to a parent question what was parent’s response? |  | | |
| Did nurse encourage parent to express ideas |  | | |
| What feedback was obtained from parent |  | | |
| What measures did nurse take to evaluate teaching effectiveness? E.g. follow up consultation or phone call? |  | | |
| **Environment:** |  | | |
| Furniture placement  In consultation |  | | |
| Equipment/toys |  | | |
| Privacy |  | | |

**Supplementary File 2**

Braun and Clarke’s six steps of thematic analysis (2013)

|  |
| --- |
| 1. familiarising themselves with their data 2. generating the codes systematically across the data set, collating data to each code 3. searching for themes from the collated data and collating data to those potential themes 4. reviewing the themes, checking that data relevant to each theme is coded 5. defining and naming the themes, and determining ‘their story’ 6. writing – communicating findings, weaving together narrative and data contextualising analysis to existing literature and the research questions |
